# Supplementary material
Source: publisher figshare collection journal article supplement (https://frontiersin.figshare.com/ndownloader/files/26772401)
Supplement: Supplementary file [file 26772401]

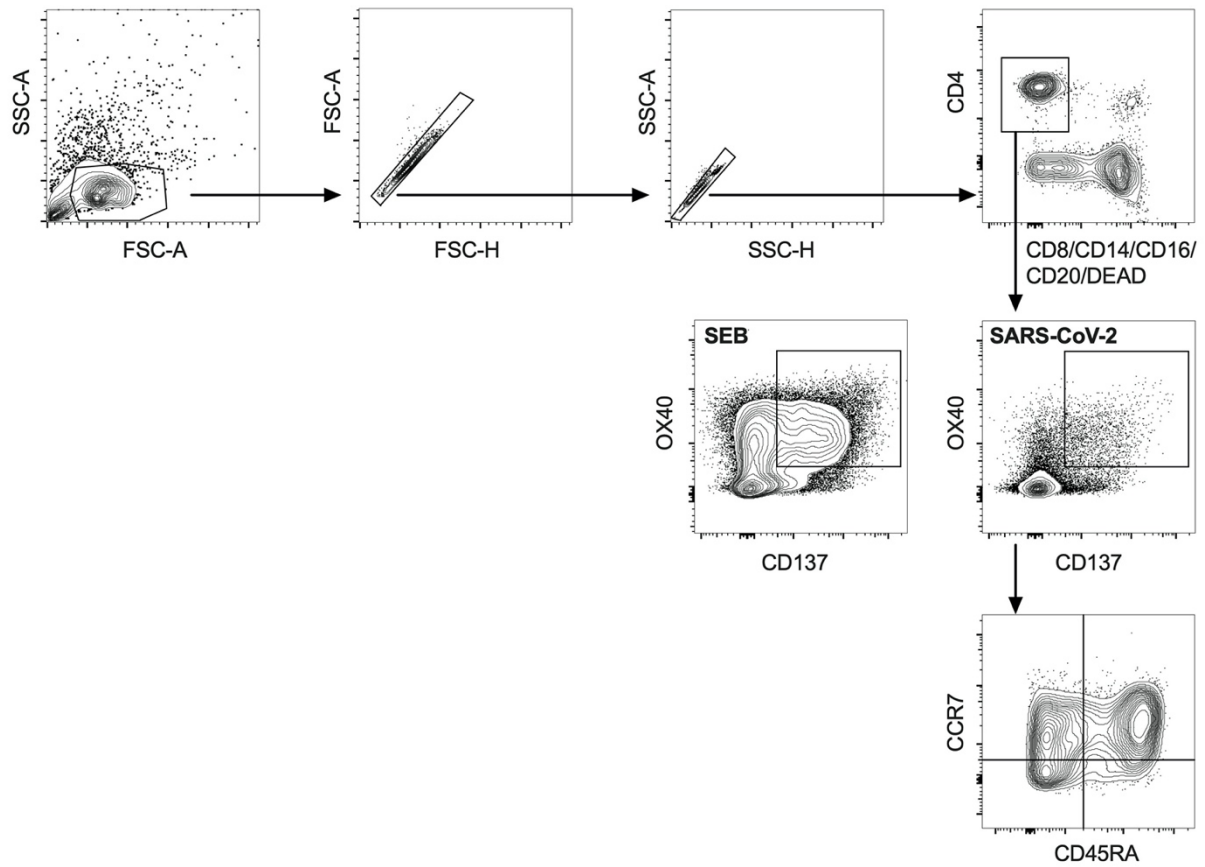

**Supplementary Figure 1. Flow cytometry Gating Strategy.** The example gating strategy for analysing the OX40<sup>+</sup>CD137<sup>+</sup> (AIM<sup>+</sup>) CD4<sup>+</sup> T cells in the PBMCs from unexposed donors and the recovered COVID-19 patients.

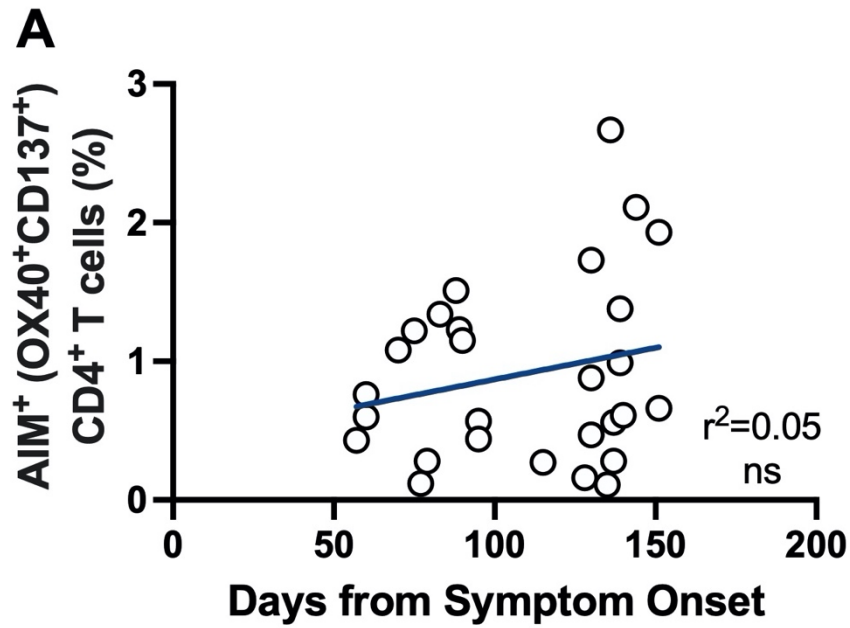

**Supplementary Figure 2. Correlation of SARS-CoV-2 Spike-specific CD4<sup>+</sup> T cell response with the time from symptoms onset.** The frequency of SARS-CoV-2 specific CD4<sup>+</sup> T cells was determined in the subjects recovered from COVID-19. The PBMCs were stimulated with the peptide megapool specific to Spike glycoprotein (Spike) and antigen-specific cells were determined using the AIM assay. (A) Correlation of the frequency of AIM<sup>+</sup> Spike-specific CD4<sup>+</sup> T cells with the days from symptoms onset in recovered patients. Each circle represents a COVID-19 subject. Statistical analysis was performed by simple linear regression. ns: non-significant.

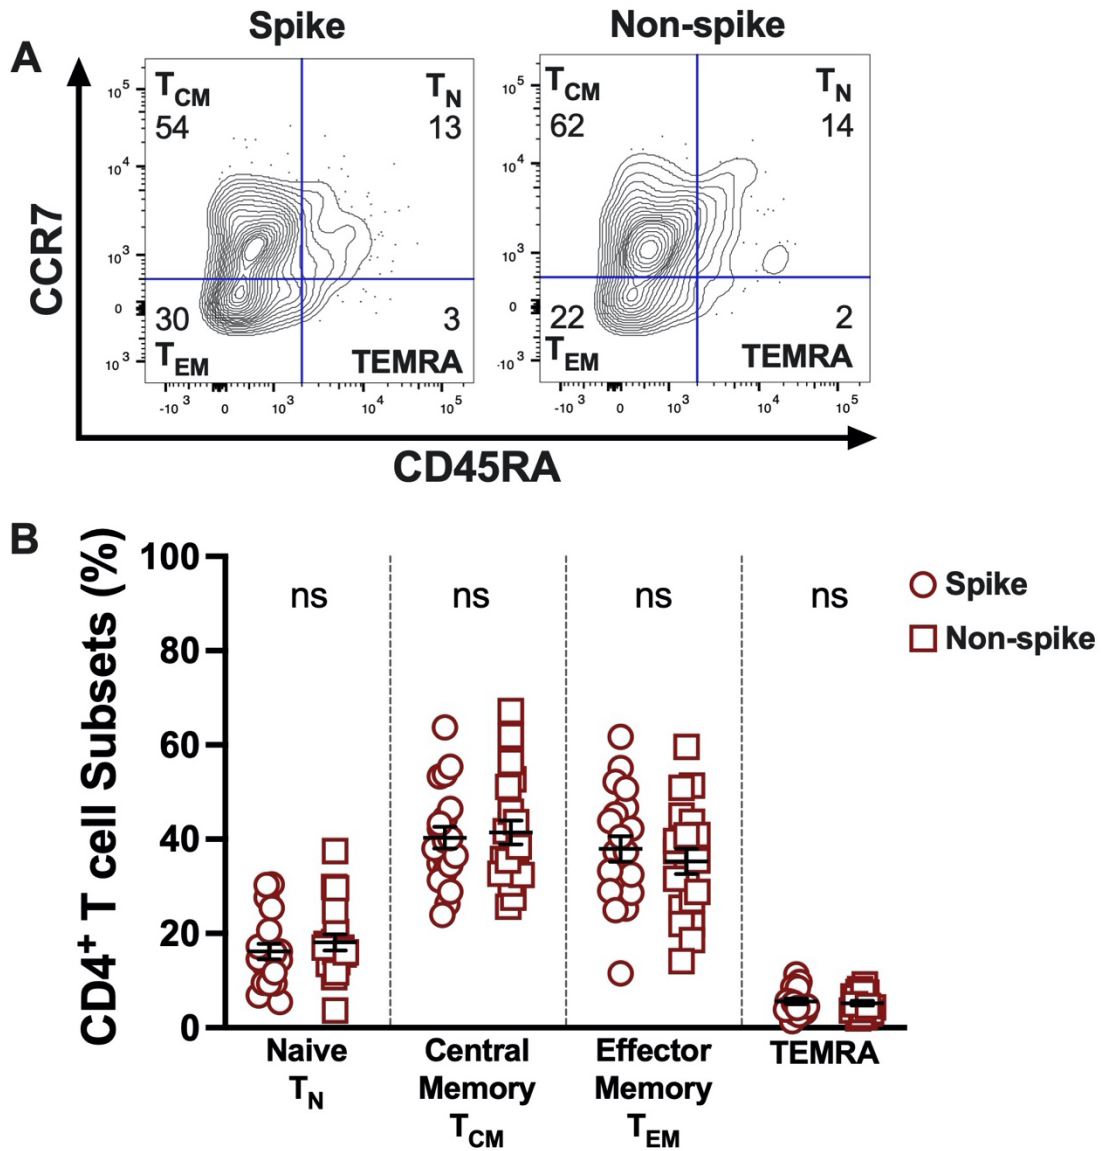

**Supplementary Figure 3. Memory phenotype of SARS-CoV-2-specific CD4<sup>+</sup> T cells in recovered COVID-19 patients.** The memory phenotype of the antigen-specific CD4<sup>+</sup> T cells was determined in the COVID-19 recovered subjects (n=20). The PBMCs were stimulated with the peptide megapool specific to Spike glycoprotein (Spike) or to the remainder of the SARS-CoV-2 polyprotein (Non-spike). (A) Example FACS plot for analysing the memory phenotype on antigen-specific AIM<sup>+</sup> (OX40<sup>+</sup>CD137<sup>+</sup>) CD4<sup>+</sup> T cells. (B) Proportion of memory phenotype in the antigen-specific AIM<sup>+</sup>CD4<sup>+</sup> T cells. Phenotypes of AIM<sup>+</sup>CD4<sup>+</sup> T cells were defined by the expression of CD45RA and CCR7. CD4<sup>+</sup> T cell subsets were defined as naïve ( $T_N$ ) cells (CD45RA<sup>+</sup>CCR7<sup>+</sup>), central memory ( $T_{CM}$ ) cells (CD45RA<sup>-</sup>CCR7<sup>+</sup>), effector memory ( $T_{EM}$ ) cells (CD45RA<sup>-</sup>CCR7<sup>-</sup>), and TEMRA cells (CD45RA<sup>+</sup>CCR7<sup>-</sup>). Black bars indicate the geometric mean. Statistical comparisons were performed by two-tail Mann-Whitney test. ns: non-significant.

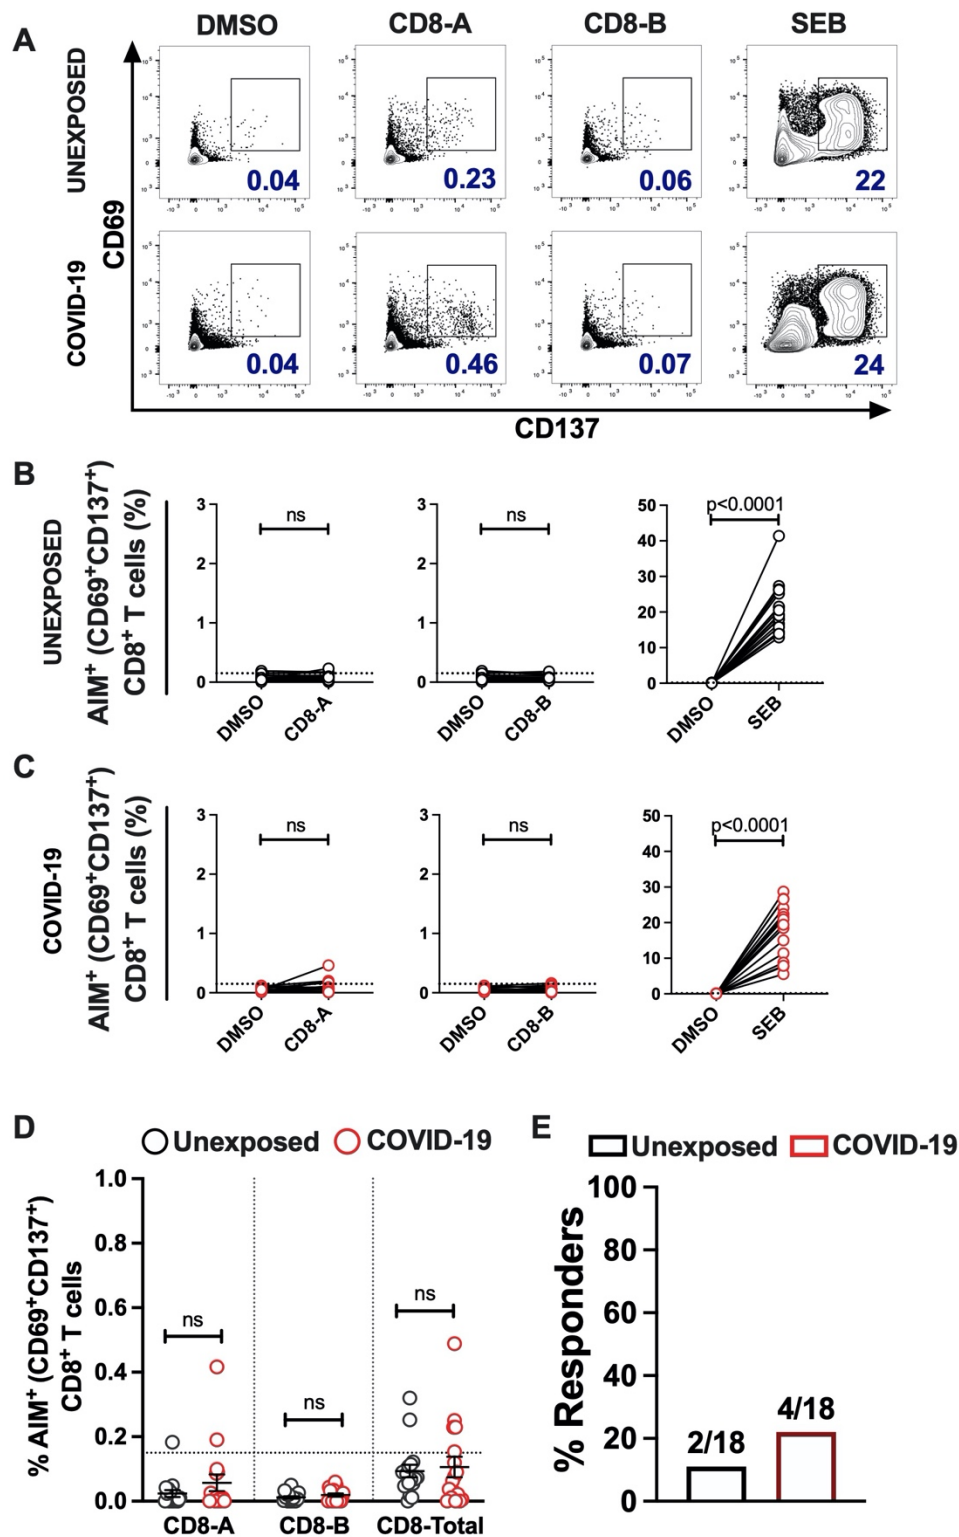

**Supplementary Figure 4. SARS-CoV-2-specific CD8<sup>+</sup> T cells response in unexposed donors and recovered COVID-19 patients.** The magnitude of SARS-CoV-2 specific CD8<sup>+</sup> T cells was determined in PBMCs collected from unexposed donors (“Unexposed”, n=18) prior to pandemic and in COVID-19 patients (“COVID-19”, n=18) up to 5 months of recovery. The PBMCs were stimulated with the class I peptide megapool (MP) comprises of 628 predicted CD8 epitopes and split into two MPs (CD8-A and CD8-B). DMSO was used as the negative control, and SEB was used for positive stimulation control. **(A)** Representative FACS contour plots of unexposed and COVID-19 patient in stimulation conditions of DMSO, CD8-A MP, CD8-B MP, and SEB. Paired graphs depicting the reactivity of AIM<sup>+</sup> (CD69<sup>+</sup>CD137<sup>+</sup>) CD8<sup>+</sup>

T cells between the negative control (DMSO) and antigen-specific stimulation in **(B)** Unexposed donors **(C)** COVID-19 patients. **(D)** Percentage of the SARS-CoV-2 specific AIM<sup>+</sup> (CD69<sup>+</sup>CD137<sup>+</sup>) CD8<sup>+</sup> T cells after stimulation with the class I MPs (CD8-A, CD8-B) and the combined data of both the MPs, analysed in the same samples as in panel B and C. The data obtained in MPs stimulation were background subtracted with the respective DMSO negative controls. Black bars indicate the geometric mean. **(E)** Frequency of responders in unexposed and COVID-19 recovered subjects determined from the combined data of CD8-A and CD8-B MPs after background subtracted from the DMSO negative controls. The value on bars denote the number of responders/total number of donors tested. Dotted line in panels B, C and D represent the limit of detection. Statistical comparisons were performed by (B-C) Wilcoxon paired t-test and (D) two-tail Mann-Whitney test. ns: non-significant.
